# Supplementary material
Source: Royal Society of Chemistry journal article supplement (doi:10.1039/d5nh00667h)

# Supplements

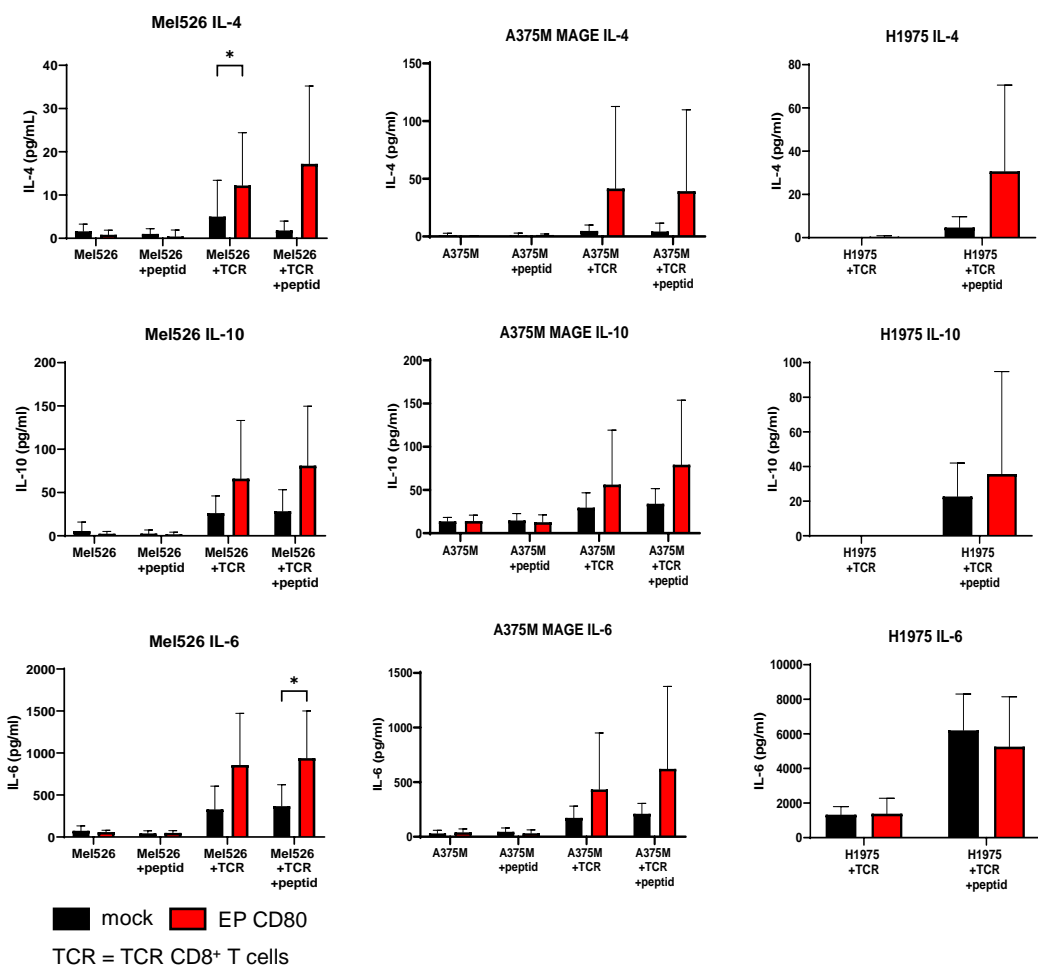

Supplement: d5nh00667h2.pdf [file d5nh00667h2.pdf]
